# Supplementary material for: Timed Action of IL-27 Protects from Immunopathology while Preserving Defense in Influenza
Source: PubMed Central journal article supplement (PMC4014457; doi:10.1371/journal.ppat.1004110), 2014-05-08
Supplement: ppat.1004110.s001.pdf [file ppat.1004110.s001.pdf]

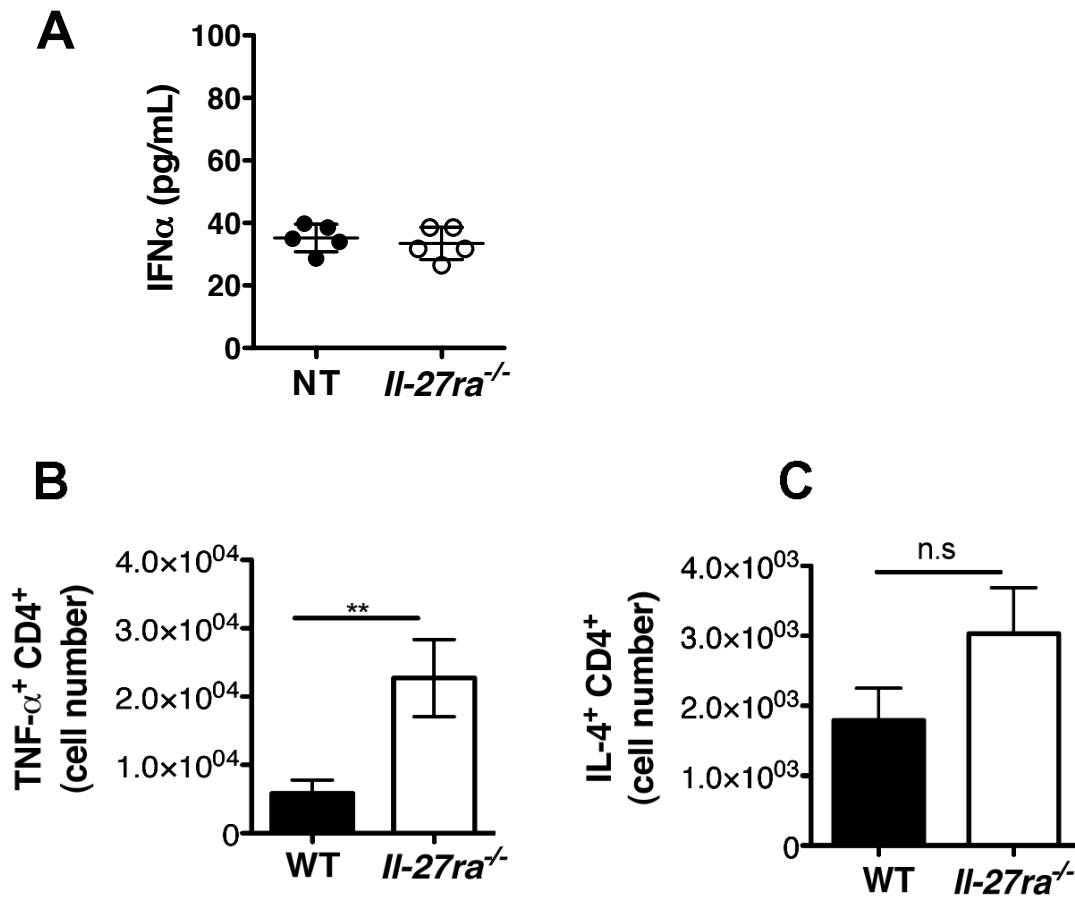

**Supplementary Figure 1. Similar levels of IFN $\alpha$  in BAL but increased numbers of TNF- $\alpha$ <sup>+</sup>CD4<sup>+</sup> T cells in the lungs of influenza virus infected *Il-27ra*<sup>-/-</sup> mice.** *Il-27ra*<sup>-/-</sup> ( $n = 4$ ) or C57BL/6 ( $n = 4$ ) mice were infected with 2500 EID influenza virus. At 9 d.p.i, levels of IFN $\alpha$  were assayed with bead array in BAL (A), and cells isolated from lung tissue were analyzed by FACS to determine the numbers of TNF- $\alpha$  or IL-4-producing CD4<sup>+</sup> T cells (B, C) after *in vitro* restimulation with PMA/ionomycin. *P* values were determined by unpaired two-tailed Student's *t* test. Values are means  $\pm$  s.d.; n.s, not significant.
