# Supplementary material for: Timed Action of IL-27 Protects from Immunopathology while Preserving Defense in Influenza
Source: PubMed Central journal article supplement (PMC4014457; doi:10.1371/journal.ppat.1004110), 2014-05-08
Supplement: ppat.1004110.s003.pdf [file ppat.1004110.s003.pdf]

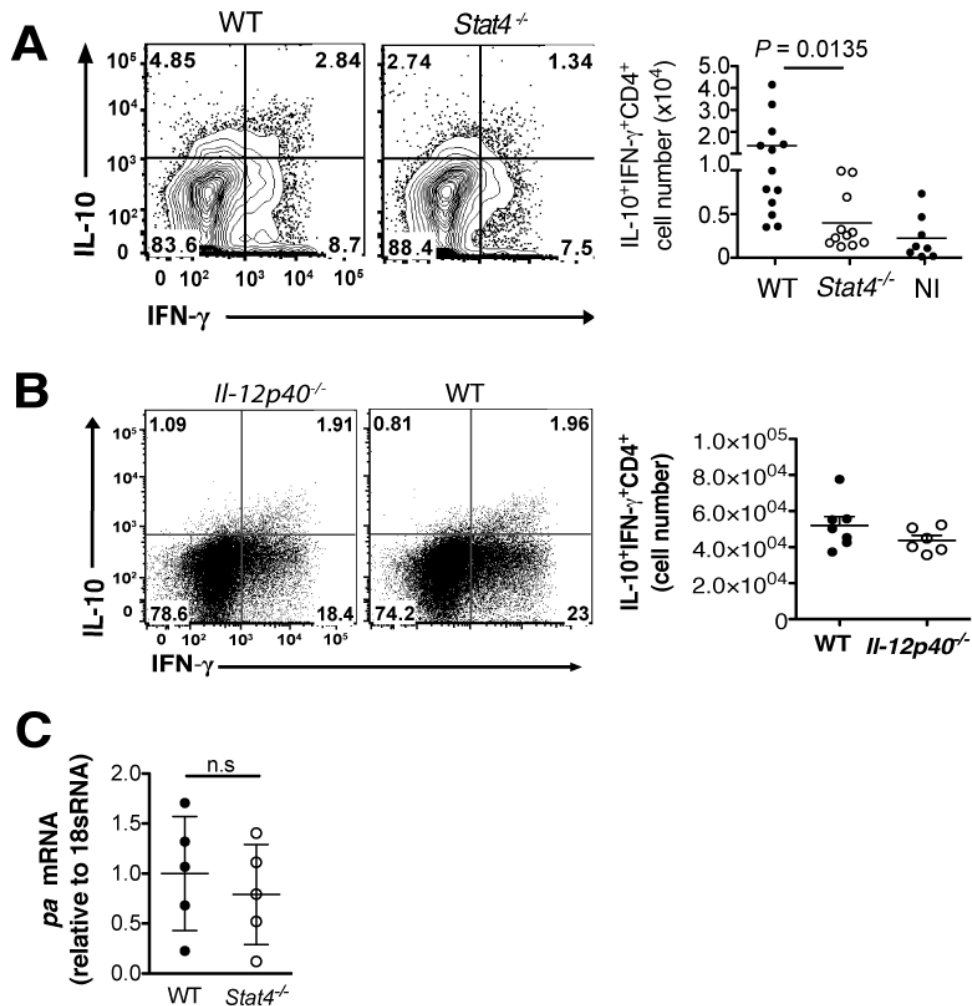

**Supplementary Figure 3. Induction of IL-10 in CD4<sup>+</sup> T cells partially requires STAT4 but not IL-12.** (A) *Stat4*<sup>-/-</sup>, (B) *Il-12p40*<sup>-/-</sup> or WT mice were infected with influenza virus. Lungs were analyzed for IL-10<sup>+</sup>IFN- $\gamma$ <sup>+</sup>CD4<sup>+</sup> T cells by FACS and (C) viral polymerase (*pa*) mRNA expression by qRT-PCR. FACS plots represent data from two independent experiments with similar results. All data sets were analyzed at 9 d.p.i and are pooled from two independent experiments. *P* values were determined by unpaired two-tailed Student's *t* test. Values are means  $\pm$  s.d.; ns, not significant.
