# Supplementary material for: Timed Action of IL-27 Protects from Immunopathology while Preserving Defense in Influenza
Source: PubMed Central journal article supplement (PMC4014457; doi:10.1371/journal.ppat.1004110), 2014-05-08
Supplement: ppat.1004110.s004.pdf [file ppat.1004110.s004.pdf]

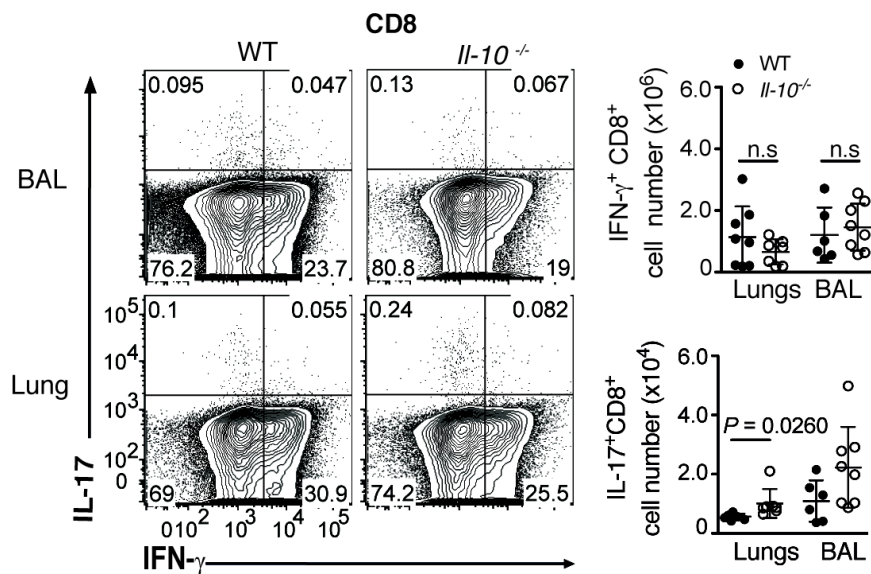

**Supplementary Figure 4. IL-10 deficiency results in increased frequencies of IL-17 but not IFN- $\gamma$ <sup>+</sup> T cells in the lungs.** *Il-10*<sup>-/-</sup> or C57BL/6 (WT) mice were infected with a sublethal dose influenza virus. At 7 d.p.i., antigen-specific IFN- $\gamma$  or IL-17-producing CD8<sup>+</sup> T cells in the BAL and lungs were assessed by FACS. Data were pooled from two independent experiments with similar results. *P* values were determined by unpaired two-tailed Student's *t* test. Values are means  $\pm$  s.d.; ns, not significant.
