# Supplementary material for: Timed Action of IL-27 Protects from Immunopathology while Preserving Defense in Influenza
Source: PubMed Central journal article supplement (PMC4014457; doi:10.1371/journal.ppat.1004110), 2014-05-08
Supplement: ppat.1004110.s005.pdf [file ppat.1004110.s005.pdf]

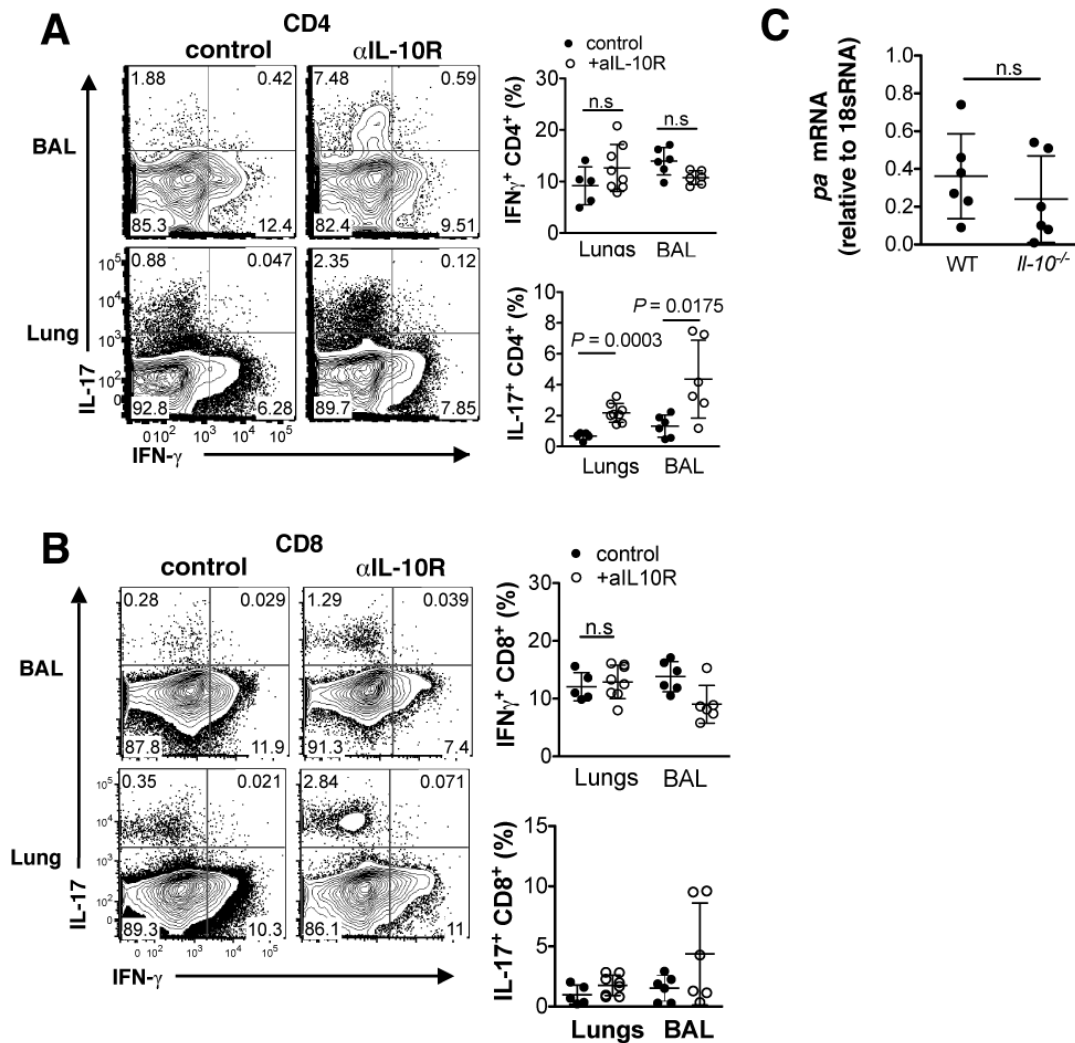

**Supplementary Figure 5. Blocked IL-10 signaling during influenza impaired IL-17, but not IFN- $\gamma$  expression in T cells.** C57BL/6 mice were infected with a sublethal dose influenza virus then administered with anti-IL-10 receptor blocking-antibody ( $\alpha$ IL-10R). influenza peptide-specific cytokine production by (A) CD4<sup>+</sup> or (B) CD8<sup>+</sup> T cells was detected through FACS after *in vitro* restimulation with immunodominant influenza virus peptides. (C) viral (*pa*) polymerase mRNA expression of sublethally infected *Il-10*<sup>-/-</sup> or C57BL/6 mice at 7 d.p.i. was measured by qRT-PCR. FACS plots represent data from two independent experiments. Remaining data sets are pooled from two independent experiments. *P* values were determined by unpaired two-tailed Student's *t* test. Values are means  $\pm$  s.d.; ns, not significant.
