# Supplementary material for: Timed Action of IL-27 Protects from Immunopathology while Preserving Defense in Influenza
Source: PubMed Central journal article supplement (PMC4014457; doi:10.1371/journal.ppat.1004110), 2014-05-08
Supplement: ppat.1004110.s006.pdf [file ppat.1004110.s006.pdf]

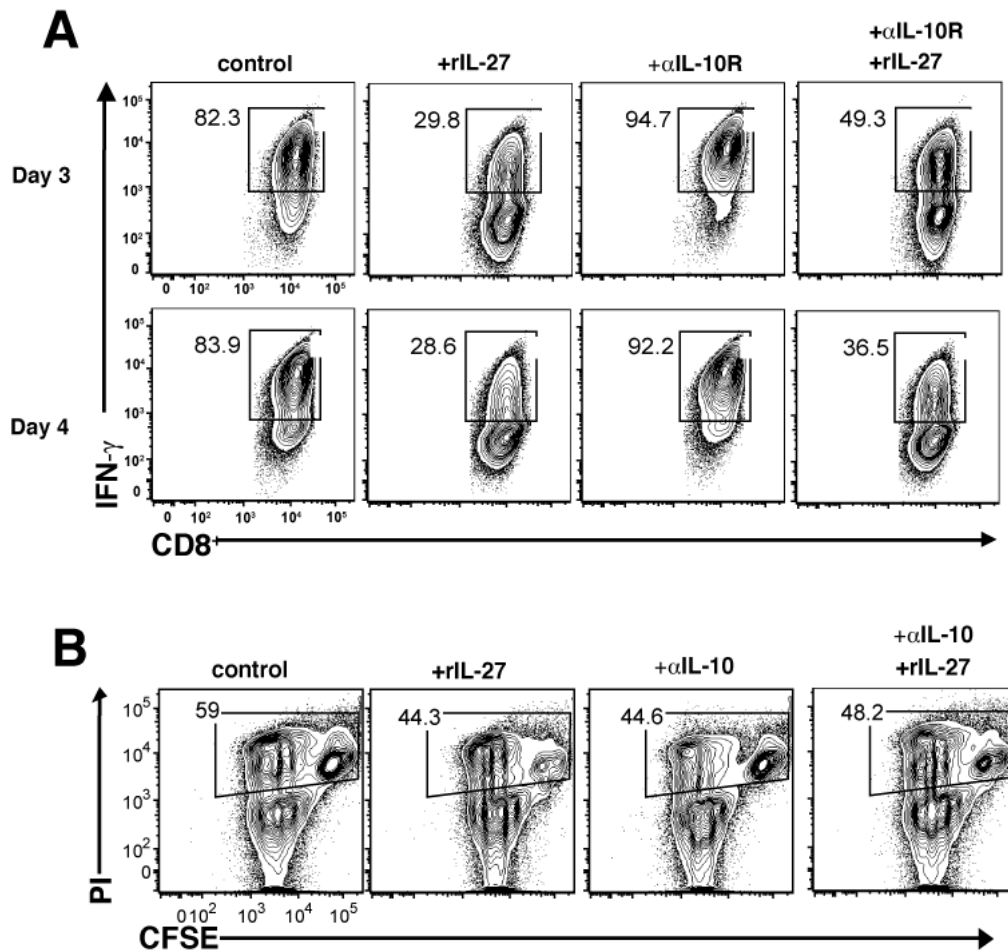

**Supplementary Figure 6. IL-27 suppresses IFN- $\gamma$  production by CD8<sup>+</sup> T cells independently from IL-10 without inducing activation-induced cell death (AICD).** (A) Naive CD8<sup>+</sup> T cells were activated by plate-bound anti-CD3 and anti-CD28 in Tc1 polarizing conditions and were supplemented with rIL-27 and/or  $\alpha$ IL-10R antibody. After 3d in culture, cells were transferred to plates without stimuli then media was added with rIL-2 and/or rIL-27 and  $\alpha$ IL-10R antibody for an additional 2 days for a total of 5 days in culture. FACS was performed to detect IFN- $\gamma$ -producing Tc1 cells in various conditions. (B) Previously CFSE-labelled Tc1 cells were cultured as mentioned above then stained with propidium iodide (PI) prior to FACS acquisition to determine cell death. All data sets represent data obtained from at least two independent experiments with similar results.
