# Supplementary material for: Timed Action of IL-27 Protects from Immunopathology while Preserving Defense in Influenza
Source: PubMed Central journal article supplement (PMC4014457; doi:10.1371/journal.ppat.1004110), 2014-05-08
Supplement: ppat.1004110.s007.pdf [file ppat.1004110.s007.pdf]

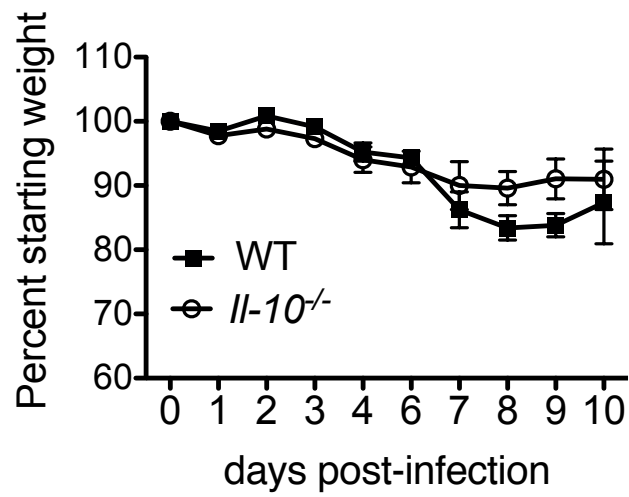

**Supplementary Figure 7. Deficiency in IL-10 does not aggravate disease course in influenza virus infected mice.** *Il-10<sup>-/-</sup>* and C57BL/6 mice were infected with a sublethal dose of influenza virus and weight loss was monitored daily. Values are means  $\pm$  s.d.
