# Supplementary material for: Timed Action of IL-27 Protects from Immunopathology while Preserving Defense in Influenza
Source: PubMed Central journal article supplement (PMC4014457; doi:10.1371/journal.ppat.1004110), 2014-05-08
Supplement: ppat.1004110.s008.pdf [file ppat.1004110.s008.pdf]

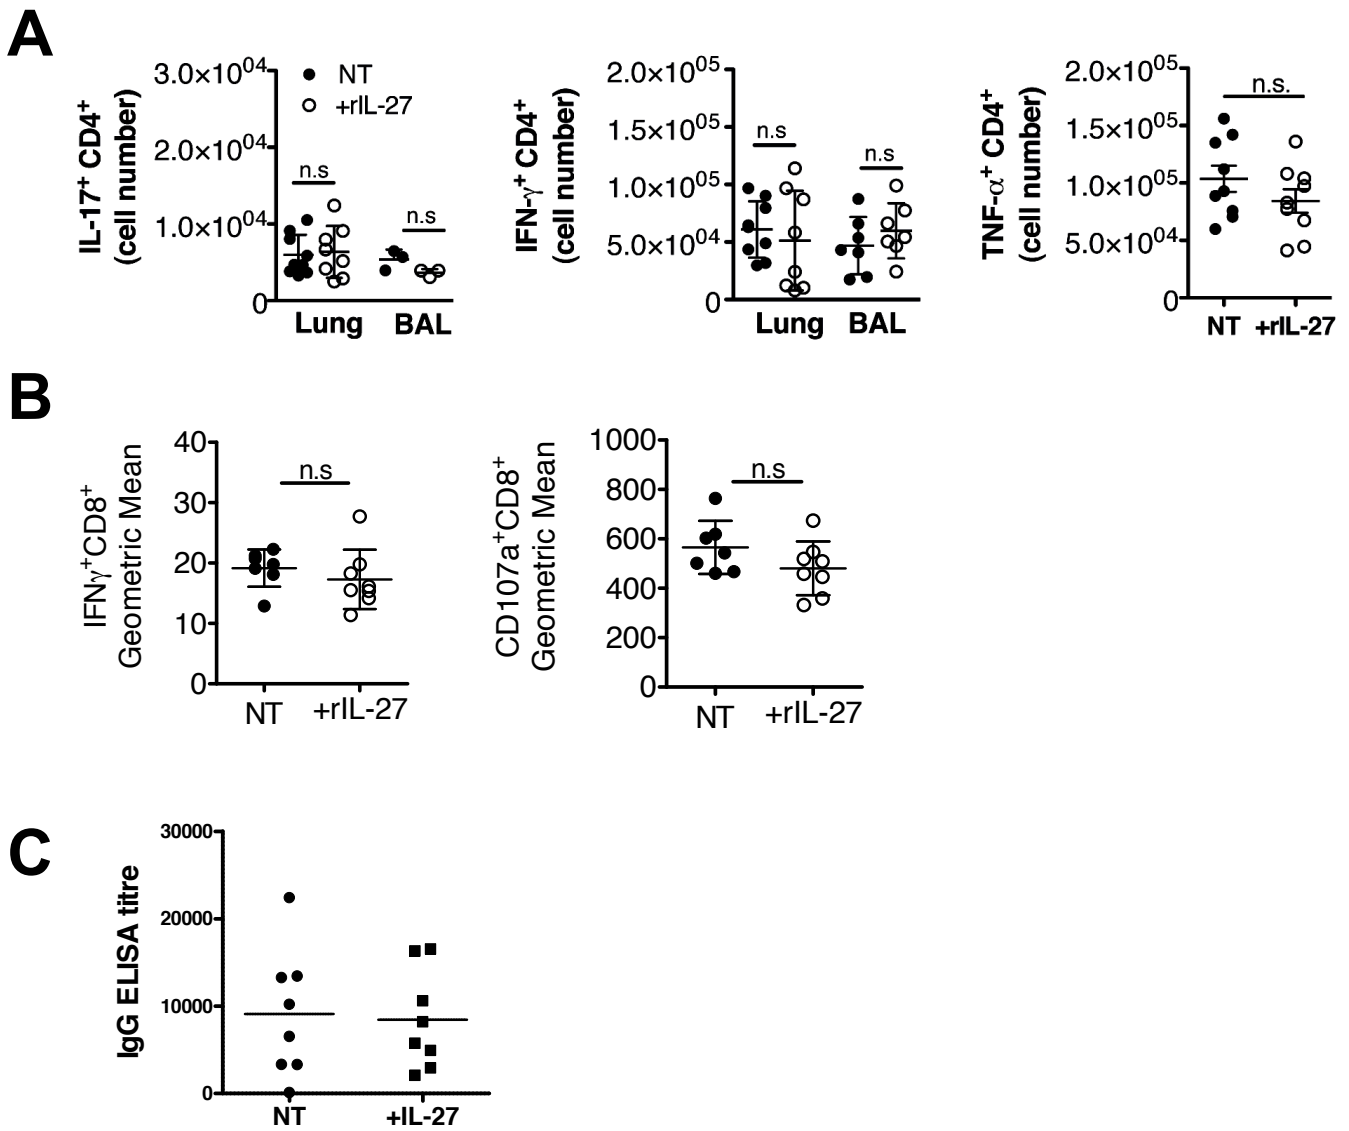

**Supplementary Figure 8. rIL-27 treatment during the later phase of influenza does not affect antigen-specific CD4<sup>+</sup> T cell cytokine responses, CD8<sup>+</sup> (CTL) activity or levels of virus-specific antibody.** C57BL/6 mice were infected with influenza virus and treated with rIL-27 daily from 5-9 d.p.i. At 9 d.p.i., (A) influenza peptide-specific cytokine production by CD4<sup>+</sup> T cells from lung and BAL, and (B) IFN $\gamma$  production or CD107 surface expression by CD8<sup>+</sup> cells from lung were analyzed by FACS after restimulation with influenza virus peptides. (C) Virus-specific antibody titers were analyzed with ELISA in plates coated with PR/8/34 virus. *P* values were determined by unpaired two-tailed Student's *t* test. Values are means  $\pm$  s.d.; n.s., not significant
