# Supplementary material for: Timed Action of IL-27 Protects from Immunopathology while Preserving Defense in Influenza
Source: PubMed Central journal article supplement (PMC4014457; doi:10.1371/journal.ppat.1004110), 2014-05-08
Supplement: ppat.1004110.s010.pdf [file ppat.1004110.s010.pdf]

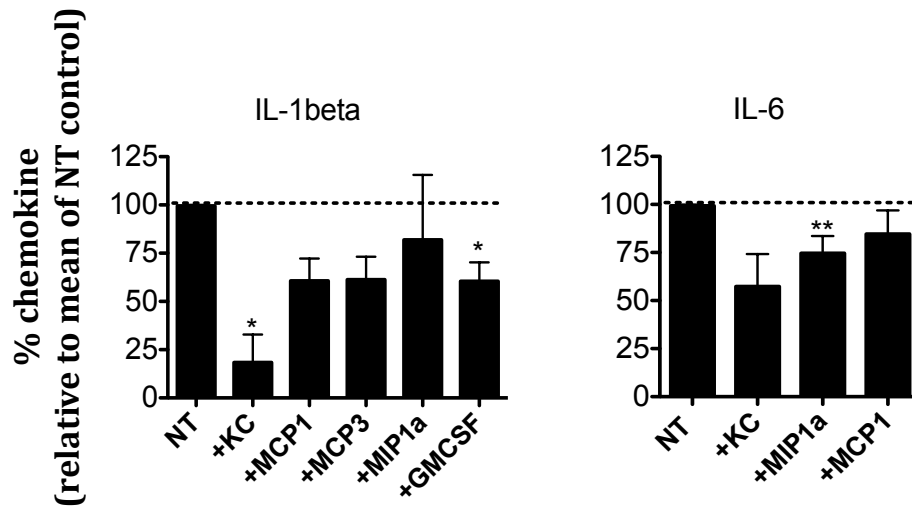

**Supplementary Figure 10. IL-27 suppresses IL-1 or IL-6-induced chemokine production in lung endothelial cells.** Sorted lung endothelial cells (CD45<sup>-</sup> CD31<sup>+</sup>) from C57BL/6 mice were stimulated with IL-1 or IL-6 in the presence of absence of IL-27. After 24h, levels of various chemokines were measured.
