# Supplementary material for: Timed Action of IL-27 Protects from Immunopathology while Preserving Defense in Influenza
Source: PubMed Central journal article supplement (PMC4014457; doi:10.1371/journal.ppat.1004110), 2014-05-08
Supplement: ppat.1004110.s011.pdf [file ppat.1004110.s011.pdf]

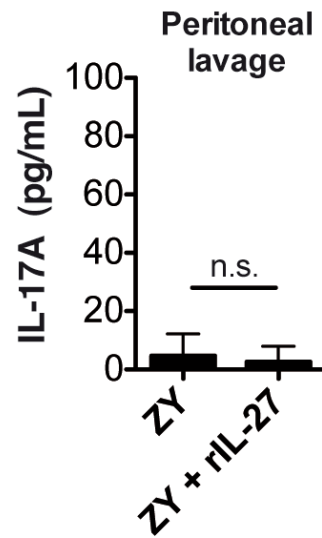

**Supplementary Figure 11. Minimal levels of IL-17 were found in zymosan-induced peritonitis (compare to Fig. 4F).** Zymosan (ZY) alone or in combination with rIL-27 (ZY+ rIL-27) were injected into C57BL/6 intraperitoneally. 24h post-injection, peritoneal lavage was obtained and analyzed for IL-17 by ELISA. Bars represent  $n = 7$  (ZY) and  $n = 9$  (ZY + rIL-27). Detection level: 4 pg according to manufacturer.  $P$  values were determined by unpaired two-tailed Student's  $t$  test. Values are means  $\pm$  s.d.; n.s, not significant.
