# Supplementary material for: Timed Action of IL-27 Protects from Immunopathology while Preserving Defense in Influenza
Source: PubMed Central journal article supplement (PMC4014457; doi:10.1371/journal.ppat.1004110), 2014-05-08
Supplement: ppat.1004110.s012.pdf [file ppat.1004110.s012.pdf]

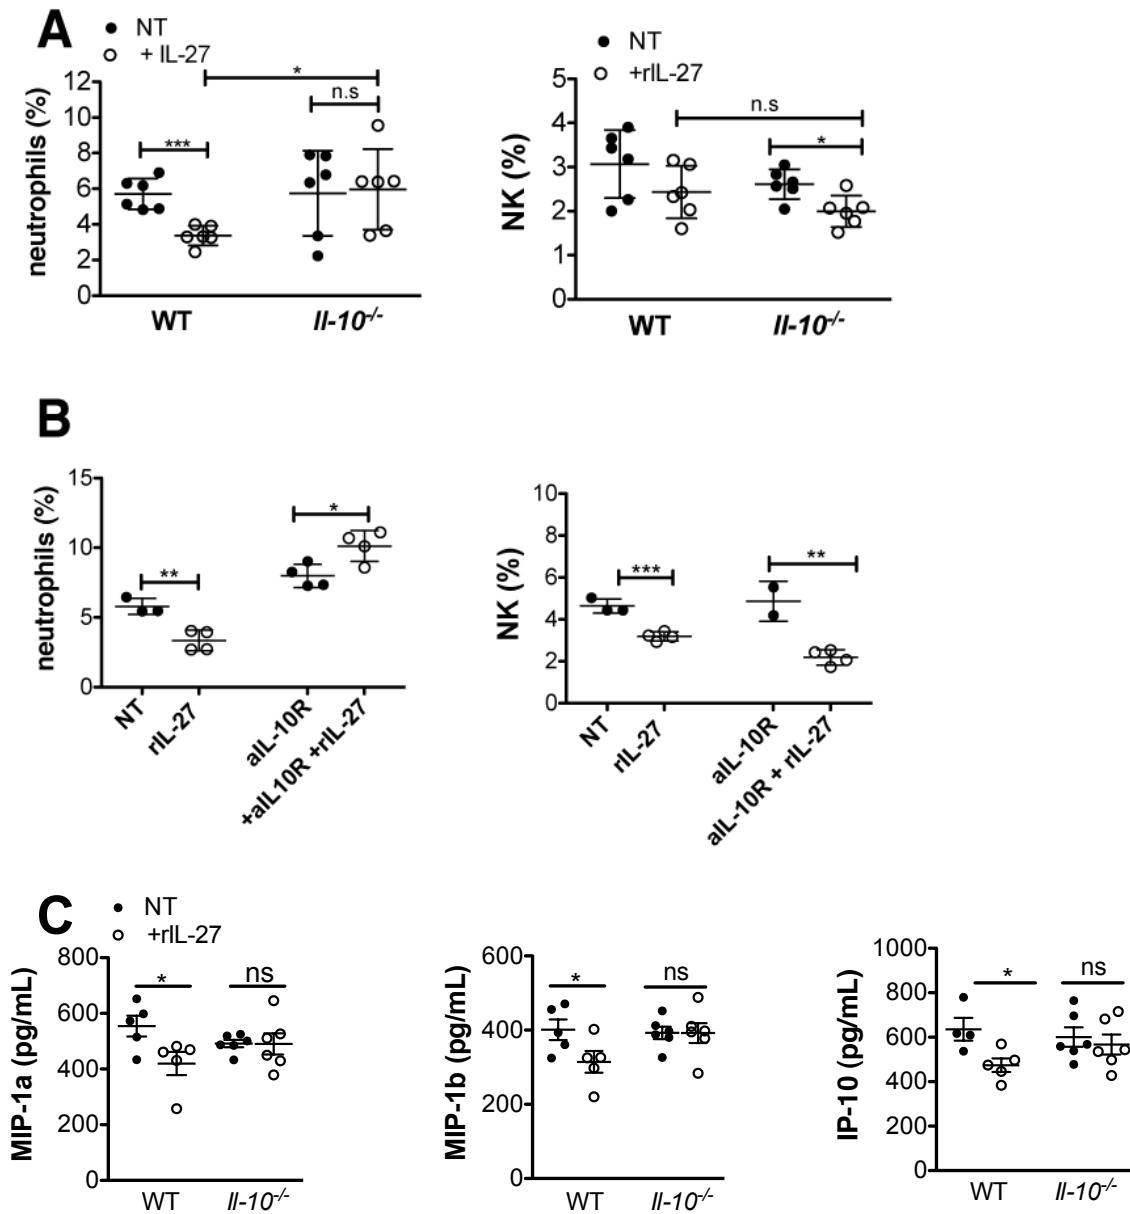

**Supplementary Figure 12. Decreased neutrophil, but not NK cell accumulation after late IL-27 treatment is dependent on IL-10 and IL-10 is required for reduction of chemokine production.** (A) *Il-10*<sup>-/-</sup> or C57BL/6 mice were infected with influenza virus and treated with rIL-27 and daily from day 1-6 p.i. At 7 d.p.i, neutrophil or NK cell frequencies were determined by FACS. (B) Influenza virus infected C57BL/6 mice were simultaneously treated with rIL-27 and anti-IL-10R antibody (aIL-10R) daily from 1-6 d.p.i. At 7 d.p.i, neutrophil or NK cell frequencies were determined by FACS. (C) Chemokine levels in the BAL fluid of *Il-10*<sup>-/-</sup> or C57BL/6 mice infected with influenza virus and treated with rIL-27. *P* values were determined by unpaired two-tailed Student's *t* test. Values are means  $\pm$  s.d. \**P*<0.05; \*\**P*<0.01; \*\*\**P*<0.0001; ns, not significant.
