# Supplementary material for: Timed Action of IL-27 Protects from Immunopathology while Preserving Defense in Influenza
Source: PubMed Central journal article supplement (PMC4014457; doi:10.1371/journal.ppat.1004110), 2014-05-08
Supplement: ppat.1004110.s014.pdf [file ppat.1004110.s014.pdf]

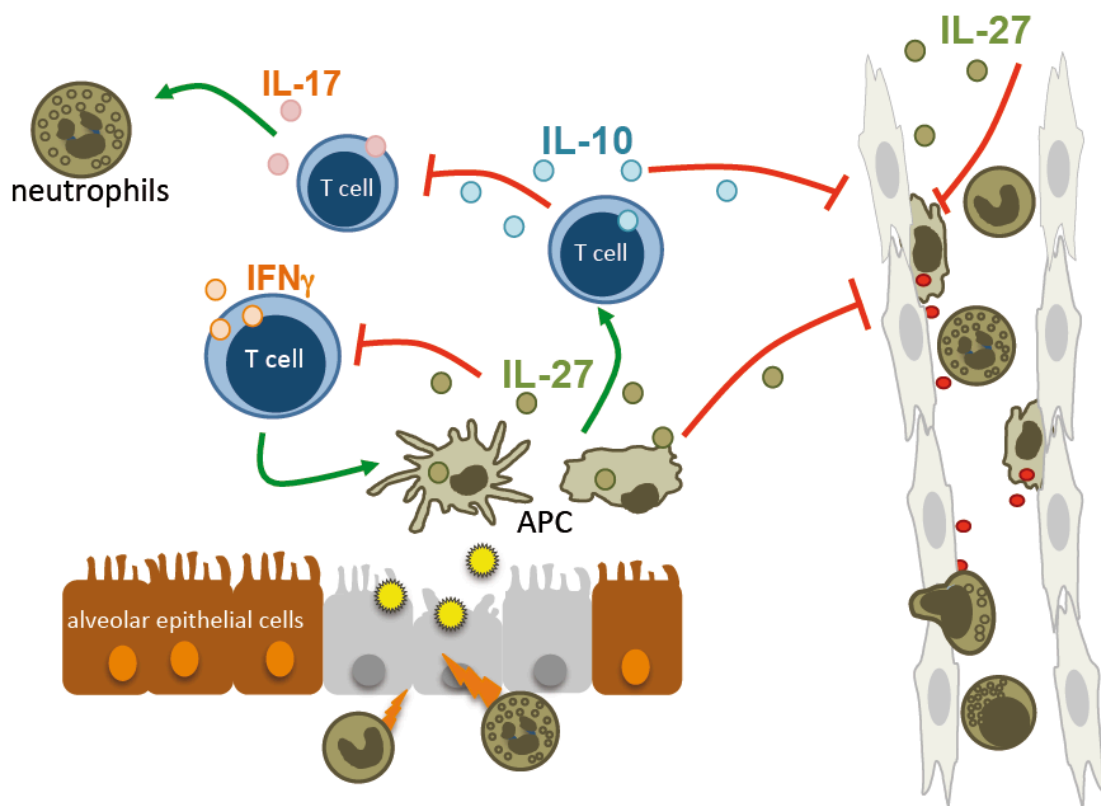

**Supplementary Figure 14. Control of inflammation by local and systemic action of IL-27 in influenza.** Hypothetical scheme of interactions. Systemic administration of rIL-27 during influenza alleviates immunopathology by reducing neutrophil and monocyte influx to the lungs and predominantly might act by affecting chemokine (red dots) production and deposition intravascularly.
