# Supplementary material for: Timed Action of IL-27 Protects from Immunopathology while Preserving Defense in Influenza
Source: PubMed Central journal article supplement (PMC4014457; doi:10.1371/journal.ppat.1004110), 2014-05-08
Supplement: ppat.1004110.s015.pdf [file ppat.1004110.s015.pdf]

**Supplementary Table 1.** Influenza virus peptides used for T cell restimulation *in vitro*.

|                                                  |                 |
|--------------------------------------------------|-----------------|
| CD8 <sup>+</sup> T cell                          |                 |
| nucleoprotein (NP) <sub>366-374</sub>            | ASNEMNDAM       |
| acid polymerase A (PA) <sub>224-233</sub>        | SSELENFRAYV     |
| nonstructural protein 2 (NS2) <sub>114-121</sub> | RTFSFQLI        |
| CD4 <sup>+</sup> T cell                          |                 |
| nucleoprotein (NP) <sub>261-275</sub>            | RSALILRGSVAHKSC |
| hemagglutinin (HA) <sub>126-138</sub>            | HNTNGVTAACHSE   |
