# Supplementary material for: Timed Action of IL-27 Protects from Immunopathology while Preserving Defense in Influenza
Source: PubMed Central journal article supplement (PMC4014457; doi:10.1371/journal.ppat.1004110), 2014-05-08
Supplement: ppat.1004110.s016.pdf [file ppat.1004110.s016.pdf]

**Supplementary Table 2.** Primers were used for qRT-PCR analysis.

|                  |                            |
|------------------|----------------------------|
| HPRT forward     | ATCATTATGCCGAGGATTTGGAA    |
| HPRT reverse     | TTGAGCACACACAGAGGGCC       |
| 18s forward      | GATCCATTGGAGGGCAAGTCT      |
| 18s reverse      | GCAGCAACTTTAATATACGCTATTGC |
| EBI3 forward     | GGCTGAGCGAATCATCAAG        |
| EBI3 reverse     | CTGTGAGGTCCTGAGCTGAC       |
| IL-27p28 forward | CTGGTACAAGCTGGTTCCTG       |
| IL-27p28reverse  | TCAGAGTCAGAGAGGTGATGC      |
| IL-10 forward    | GCACTACCAAAGCCACAAG        |
| IL-10 reverse    | TGTTTGAAAGAAAGTCTTCACCTG   |
| PA forward       | CGGTCCAAATTCCTGCTGA        |
| PA reverse       | CATTGGGTTTCCTTCATCCA       |
